# Supplementary material
Source: publisher figshare collection journal article supplement (https://acs.figshare.com/ndownloader/files/3783865)
Supplement: Supplementary file 1 [file 3783865]

## Supplementary Data for

# Characterization of interstrand DNA-DNA cross-links derived from abasic sites using bacteriophage $\phi$ 29 DNA polymerase

Zhiyu Yang,<sup>‡</sup> Nathan E. Price,<sup>‡</sup> Kevin M. Johnson,<sup>‡</sup> and Kent S. Gates<sup>‡,§,\*</sup>

<sup>‡</sup>Department of Chemistry, University of Missouri, Columbia, MO 65211

<sup>§</sup>Department of Biochemistry, University of Missouri, Columbia, MO 65211

\*E-mail: gatesk@missouri.edu, Ph: (573) 882-6763

## Table of Contents

|                                                                                                                                                        |   |
|--------------------------------------------------------------------------------------------------------------------------------------------------------|---|
| Figure S1. UV melting curve of duplex B (without the primer) .....                                                                                     | 2 |
| Figure S2. Primer extension by T7 DNA polymerase is blocked at the single-strand-duplex junction of duplex B.....                                      | 3 |
| Figure S3. $\phi$ 29 DNA polymerase fully extends the primer on the single-stranded substrate A and the duplex-containing substrate B.....             | 4 |
| Figure S4. All dNTP concentrations used in this study support $\phi$ 29 DNA polymerase-mediated extension of primer to full length on substrate B..... | 5 |
| Figure S5. Substrates used in primer extension reactions at 37 °C.....                                                                                 | 6 |
| Figure S6. $\phi$ 29 DNA polymerase-mediated primer extension on substrates MM, NN, and QQ at 37 °C.....                                               | 7 |

**Figure S1**

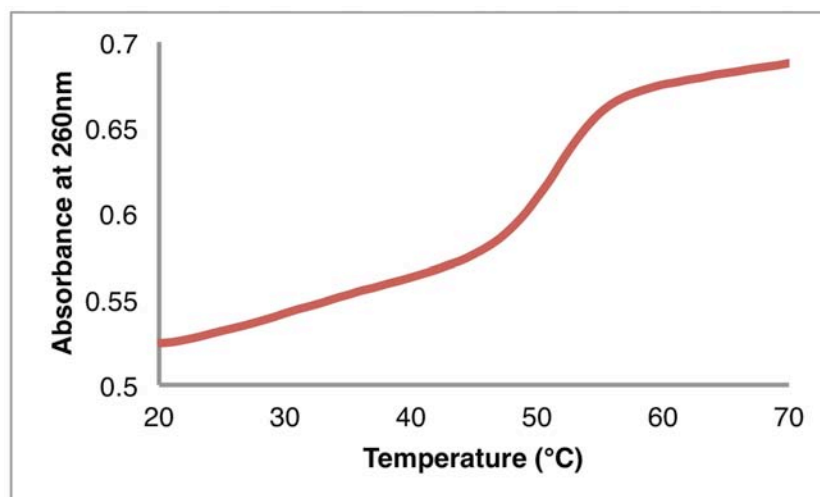

**Figure S1.** UV melting curve of duplex B (without the primer). The sample contained approximately 1  $\mu\text{M}$  duplex DNA, 50 mM Tris-HCl (pH 7.5), 10 mM  $\text{MgCl}_2$ , 10 mM  $(\text{NH}_4)_2\text{SO}_4$ , 4 mM DTT, and 0.1 mg/mL bovine serum albumin. The absorbance at 260 nm was monitored as a function of temperature, increasing from 20 °C to 70 °C, at a rate of 0.5 °C/min.

Figure S2

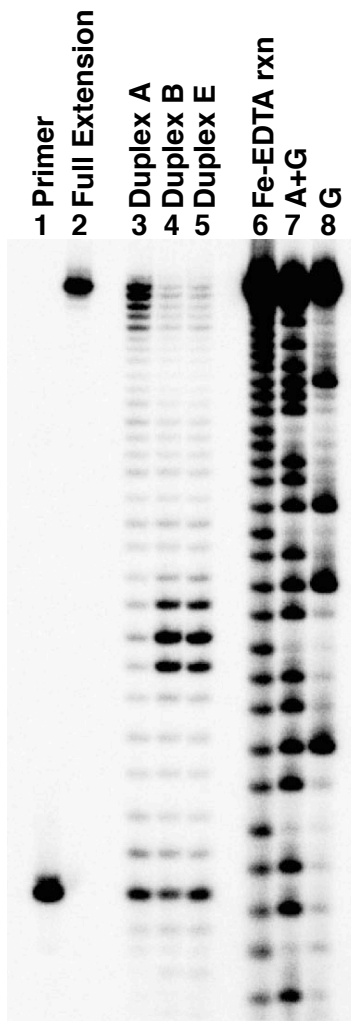

**Figure S2.** Primer extension by T7 DNA polymerase is blocked near the single-strand-duplex junction in duplexes B and E. The  $^{32}\text{P}$ -labeled primers were extended by incubation of the DNA substrates with T7 DNA polymerase (10 units) and the four dNTPs (0.5 mM in each) in Tris-HCl (50 mM, pH 7.5),  $\text{MgCl}_2$  (10 mM),  $(\text{NH}_4)_2\text{SO}_4$  (10 mM), DTT (4 mM), and bovine serum albumin (0.1 mg/mL) for 8 min at 24 °C. After reaction work-up, the primer extension products were analyzed by electrophoresis on a 20% denaturing polyacrylamide gel. Lane 1 is the 15 nt, 5'- $^{32}\text{P}$ -labeled primer, lane 2 is the 5'- $^{32}\text{P}$ -labeled full-length extension product size marker, lane 3 is primer extension on the single-stranded substrate A, lane 4 depicts the results of primer extension on the un-cross-linked duplex-containing substrate B, lane 5 depicts the results of primer extension on the cross-linked duplex-containing substrate E, lane 6 is an iron-EDTA cleavage reaction on a synthetic standard of the full-length extension product (5'- $^{32}\text{P}$ -GAT CAC AGT GAG TAC AAT AGA ATA GAT GAA CTA AGA CAT ATA), lanes 7 and 8 are Maxam-Gilbert A+G- and G-reactions on the full-length 5'- $^{32}\text{P}$ -labeled extension product. The intense bands in lanes 4 and 5 correspond to extension of the primer to the -8, -9, and -10 locations on templates B and E.

**Figure S3**

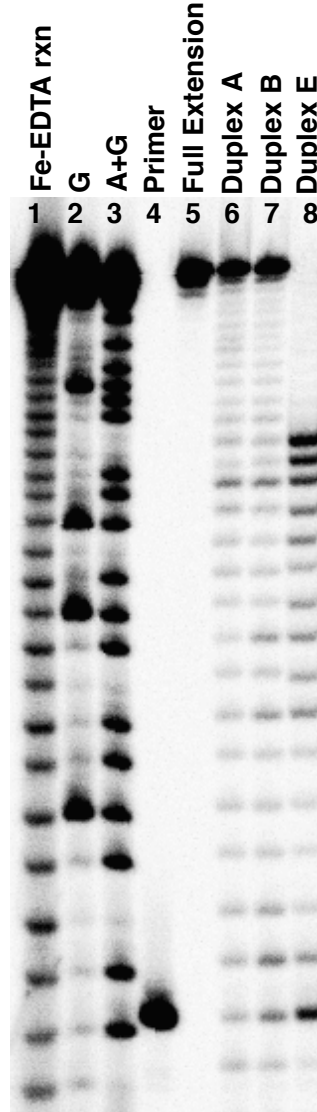

**Figure S3.**  $\phi$ 29 DNA polymerase fully extends the primer on the single-stranded substrate A and the duplex-containing substrate B. The  $^{32}\text{P}$ -labeled primers were extended by incubation of the DNA substrates with  $\phi$ 29 DNA polymerase (10 units) and the four dNTPs (1 mM in each) in Tris-HCl (50 mM, pH 7.5),  $\text{MgCl}_2$  (10 mM),  $(\text{NH}_4)_2\text{SO}_4$  (10 mM), DTT (4 mM), and bovine serum albumin (0.1 mg/mL) for 30 min at 24 °C. After reaction work-up, the primer extension products were subjected to electrophoretic analysis on a 20% denaturing polyacrylamide gel. Lane 1 is an iron-EDTA cleavage reaction on a synthetic standard of the full-length extension product (5'- $^{32}\text{P}$ -GAT CAC AGT GAG TAC AAT AGA ATA GAT GAA CTA AGA CAT ATA), lanes 2 and 3 are Maxam-Gilbert G- and A+G-reactions carried out on the 5'- $^{32}\text{P}$ -labeled full-length extension product, lane 4 is the 15 nt, 5'- $^{32}\text{P}$ -labeled primer, lane 5 is a synthetic standard of the 5'- $^{32}\text{P}$ -labeled full-length extension product, lane 6 depicts the results of primer extension on the single-stranded substrate A, lane 7 depicts the results of primer extension on the duplex-containing substrate B, and lane 8 depicts the results of primer extension on the cross-linked duplex-containing substrate E.

**Figure S4**

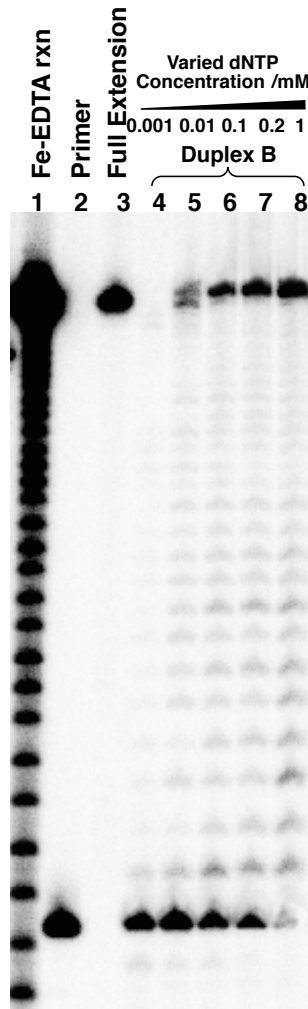

**Figure S4.** All dNTP concentrations used in this study support  $\phi$ 29 DNA polymerase-mediated extension of primer to full length on substrate B. The  $^{32}\text{P}$ -labeled primers were extended by incubation of the DNA substrates with  $\phi$ 29 DNA polymerase (10 units) and the four dNTPs (0.001-1 mM in each) in Tris-HCl (50 mM, pH 7.5),  $\text{MgCl}_2$  (10 mM),  $(\text{NH}_4)_2\text{SO}_4$  (10 mM), DTT (4 mM), and bovine serum albumin (0.1 mg/mL) for 30 min at 24 °C. After reaction work-up, the primer extension products were subjected to electrophoretic analysis on a 20% denaturing polyacrylamide gel. Lane 1 is an iron-EDTA cleavage reaction on a synthetic standard of the full-length extension product (5'- $^{32}\text{P}$ -GAT CAC AGT GAG TAC AAT AGA ATA GAT GAA CTA AGA CAT ATA), lane 2 is the 15 nt, 5'- $^{32}\text{P}$ -labeled primer, lane 3 is a synthetic standard of the 5'- $^{32}\text{P}$ -labeled full-length extension product, and lanes 4-8 depict the results of primer extension on duplex substrate B at the indicated dNTP concentrations.

### Figure S5

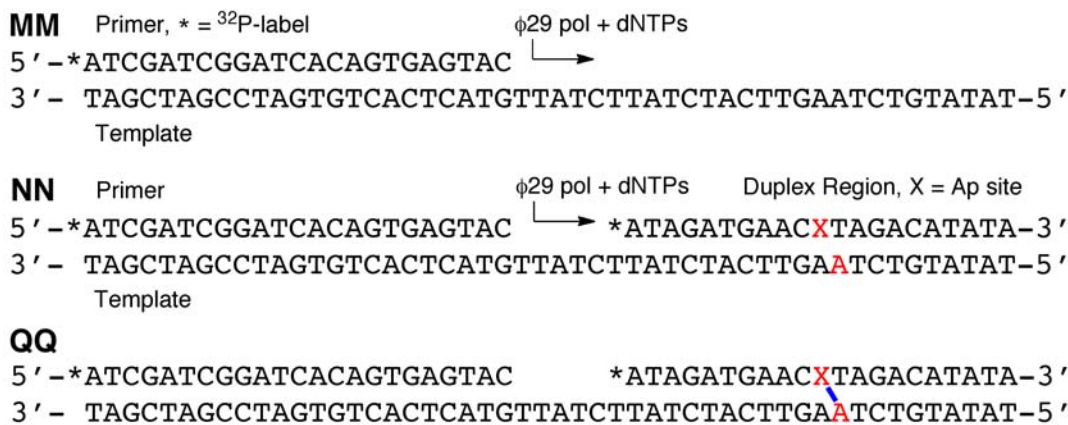

**Figure S5.** Substrates used in primer extension reactions at 37 °C. A longer primer was used in these substrates to ensure complete hybridization of the primer to the template at 37 °C. Substrates NN and QQ contain a 23 nt <sup>32</sup>P-labeled primer *and* a 21 nt <sup>32</sup>P-labeled strand in the duplex region of the substrate.

**Figure S6**

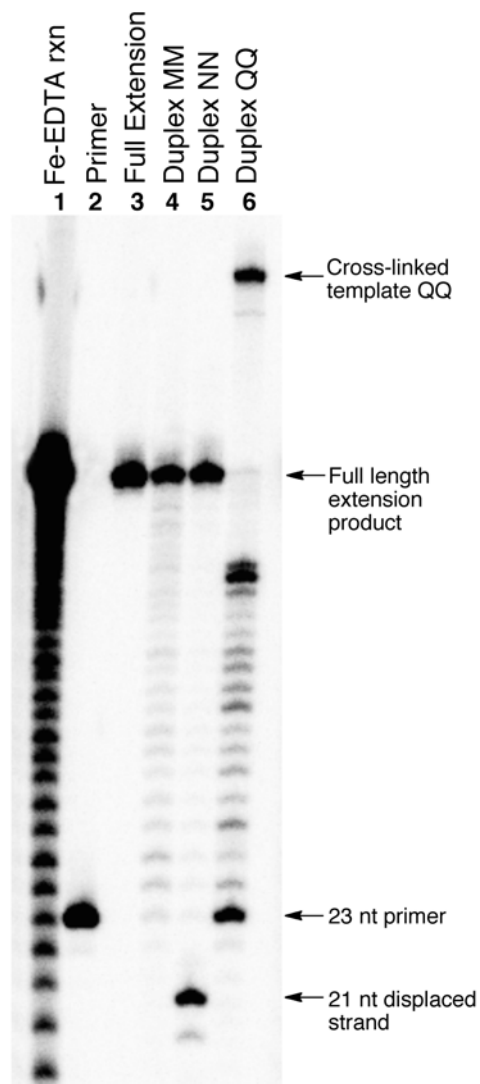

**Figure S6.**  $\phi$ 29 DNA polymerase-mediated primer extension on substrates MM, NN, and QQ at 37 °C was blocked by the dA-Ap cross-link. The  $^{32}\text{P}$ -labeled primers were extended by incubation of the DNA substrates with  $\phi$ 29 DNA polymerase (10 units) and the four dNTPs (1 mM in each) in Tris-HCl (50 mM, pH 7.5),  $\text{MgCl}_2$  (10 mM),  $(\text{NH}_4)_2\text{SO}_4$  (10 mM), DTT (4 mM), and bovine serum albumin (0.1 mg/mL) for 60 min at 37 °C. After reaction work-up, the primer extension products were subjected to electrophoretic analysis on a 20% denaturing polyacrylamide gel. Lane 1 is an iron-EDTA cleavage reaction on a synthetic standard of the full-length extension product (5'- $^{32}\text{P}$ -ATC GAT GCG ATC ACA GTG AGT ACA ATA GAA TAG ATG AAC TAA GAC ATA TA), lane 2 is the 23 nt, 5'- $^{32}\text{P}$ -labeled primer, lane 3 is a synthetic standard of the 5'- $^{32}\text{P}$ -labeled full-length extension product, and lanes 4-6 depict the results of primer extension reactions on substrates MM, NN, and QQ. Note that NN and QQ contain a 23 nt  $^{32}\text{P}$ -labeled primer *and* a 21 nt  $^{32}\text{P}$ -labeled strand in the duplex region of the substrate (Figure S5). The presence of two  $^{32}\text{P}$  labels in these substrates gives rise to the “21 nt displaced strand” and the “cross-linked template QQ” band in lanes 5 and 6, respectively.
